# Supplementary material for: A New Homogeneous Catalyst for the Dehydrogenation of Dimethylamine Borane Starting with Ruthenium(III) Acetylacetonate
Source: MDPI journal article supplement (doi:10.3390/ma8063155), 2015-06-02
Supplement: s1 [file s1]

## Supplementary Materials

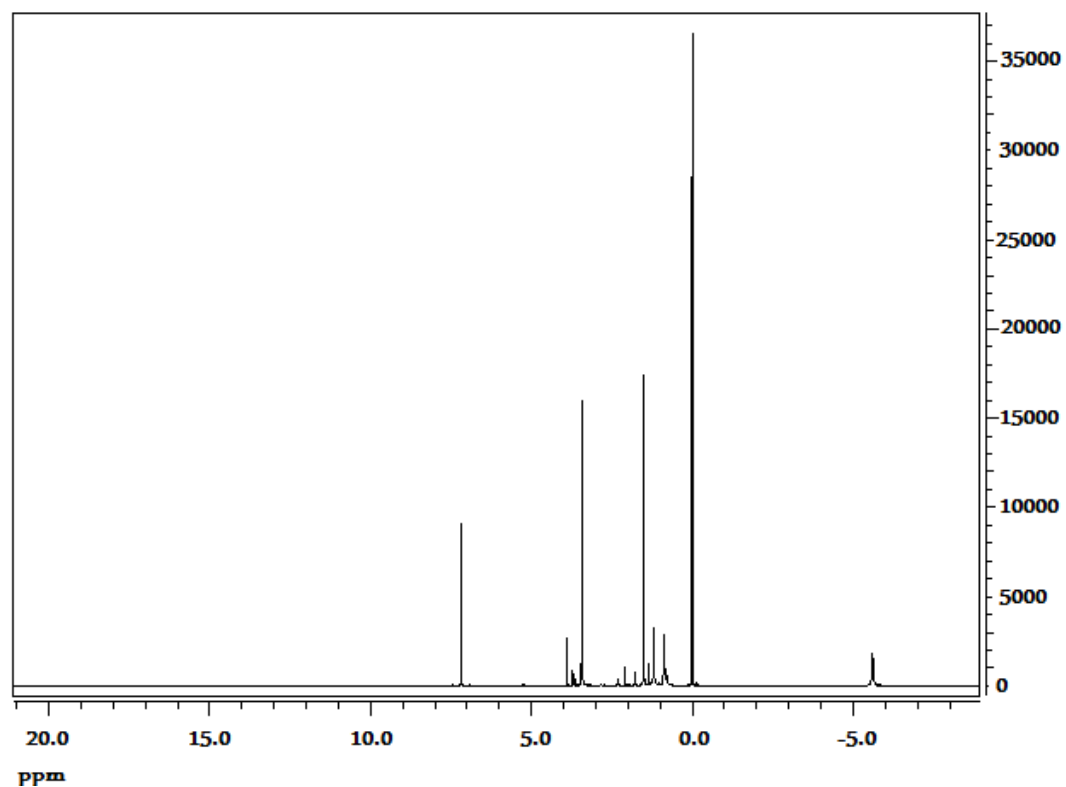

**Figure S1.** The  $^1\text{H}$  NMR spectrum of the ruthenium(II) species,  $[\text{Ru}(\text{N}_2\text{Me}_4)_3(\text{acac})\text{H}]$ , isolated after catalytic dehydrogenation of dimethylamine borane starting with  $\text{Ru}(\text{acac})_3$ , taken from chloroform- $d$  solution.
